# Supplementary material for: Myelodysplasia-associated mutations in serine/arginine-rich splicing factor SRSF2 lead to alternative splicing of CDC25C
Source: PubMed Central journal article supplement (PMC4994158; doi:10.1186/s12867-016-0071-y), 2016-08-23

**A** Subcellular localization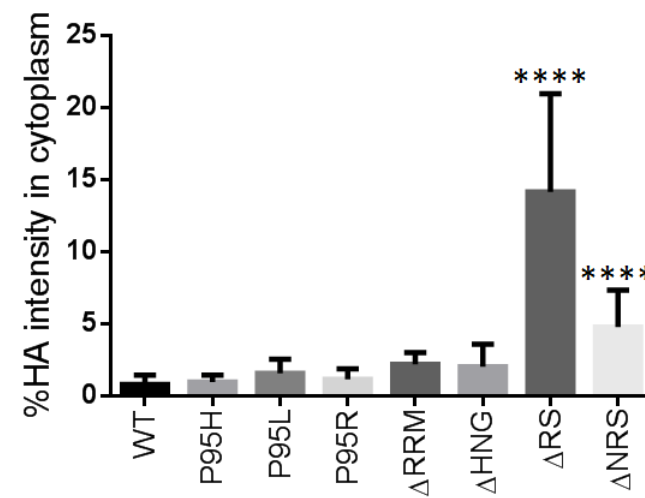**B**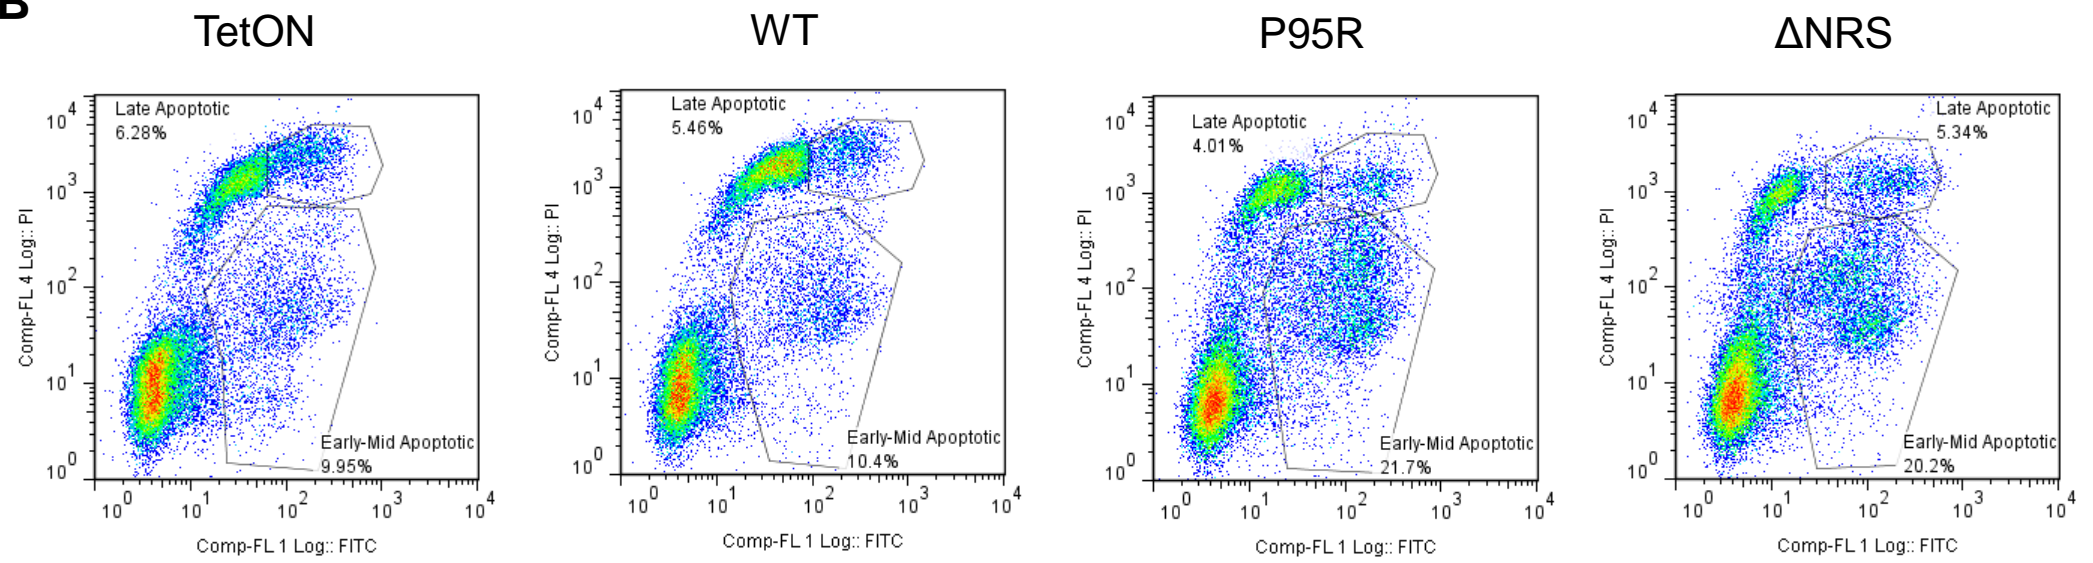**C**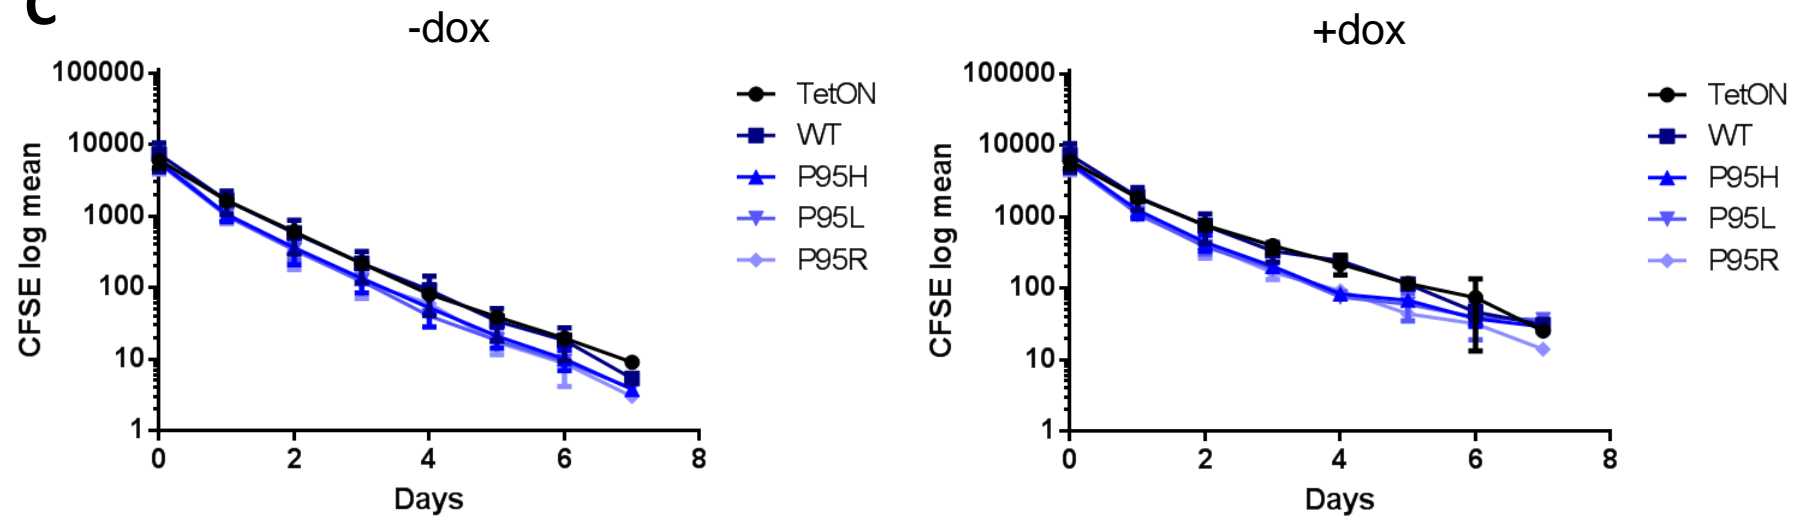

Supplement: 12867_2016_71_MOESM3_ESM.pdf [file 12867_2016_71_MOESM3_ESM.pdf]
